# Supplementary material for: The ancestral shape hypothesis: an evolutionary explanation for the occurrence of intervertebral disc herniation in humans
Source: PubMed Central journal article supplement (PMC4410577; doi:10.1186/s12862-015-0336-y), 2015-04-27
Supplement: 12862_2015_336_MOESM3_ESM.pdf [file 12862_2015_336_MOESM3_ESM.pdf]

**Table S1. Mahalanobis distances between taxon means for the last thoracic vertebrae shape.**

|                       | <b>Pathological humans</b> | <b>Orangutans</b>   | <b>Chimpanzees</b> |
|-----------------------|----------------------------|---------------------|--------------------|
| <b>Healthy humans</b> | 2.0798<br>p<0.0001*        | 3.5703<br>p<0.0001* | 1.7574<br>p=0.006* |
| <b>Chimpanzees</b>    | 1.0980<br>p=0.9490         | 2.7921<br>p<0.0001* |                    |
| <b>Orangutans</b>     | 2.8741<br>p<0.0001*        |                     |                    |

**Table S2. Mahalanobis distances between taxon means for first lumbar vertebrae shape.**

|                       | <b>Pathological humans</b> | <b>Orangutans</b>   | <b>Chimpanzees</b>  |
|-----------------------|----------------------------|---------------------|---------------------|
| <b>Healthy humans</b> | 2.7884<br>p<0.0001*        | 3.9399<br>p<0.0001* | 2.0661<br>p<0.0001* |
| <b>Chimpanzees</b>    | 1.7036<br>p<0.1429         | 2.9034<br>p<0.0001* |                     |
| <b>Orangutans</b>     | 2.6087<br>p=0.0002*        |                     |                     |
